# Supplementary material
Source: Springer Nature journal article supplement (https://www.springermedizin.de/resource/supplementary/12877_2011_755_MOESM1_ESM.pdf/9440260)

(a) Front side

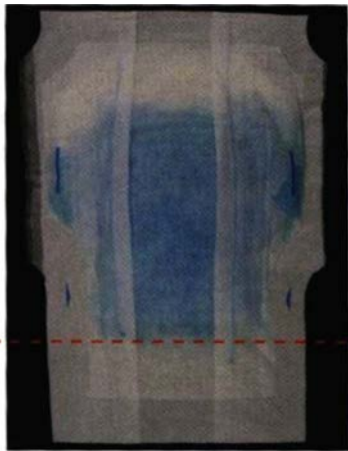

Buttock side

(b) Front side

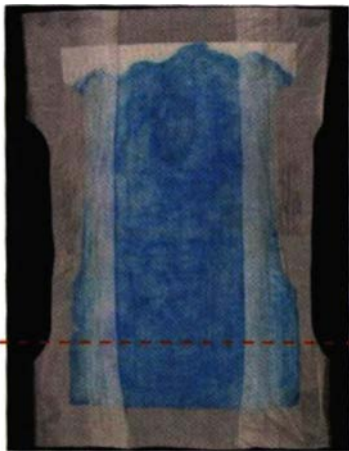

Buttock side

Supplement: MOESM1 [file 9440260]
